# Supplementary material for: SARS-CoV-2 nucleocapsid protein forms condensates with viral genomic RNA
Source: PubMed Central journal article supplement (PMC8553124; doi:10.1371/journal.pbio.3001425), 2021-10-11

**S1A Fig**

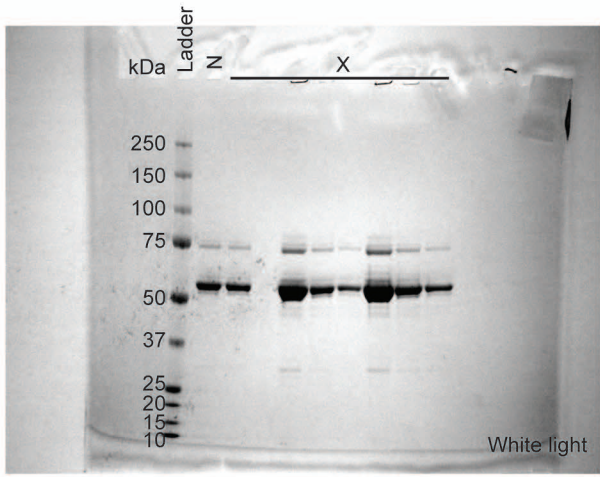

**S1E Fig**

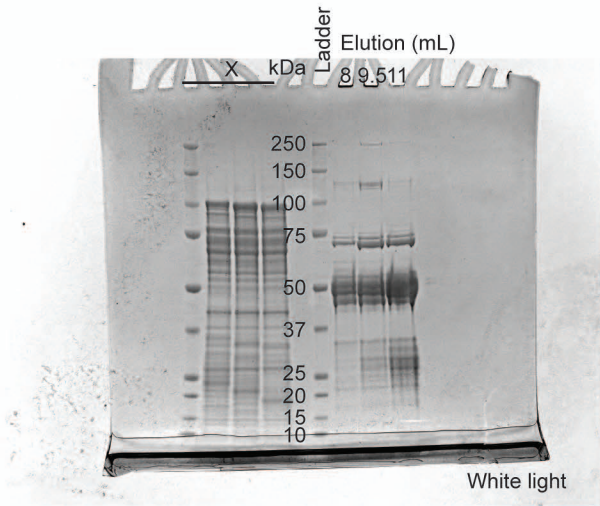

# S1F Fig

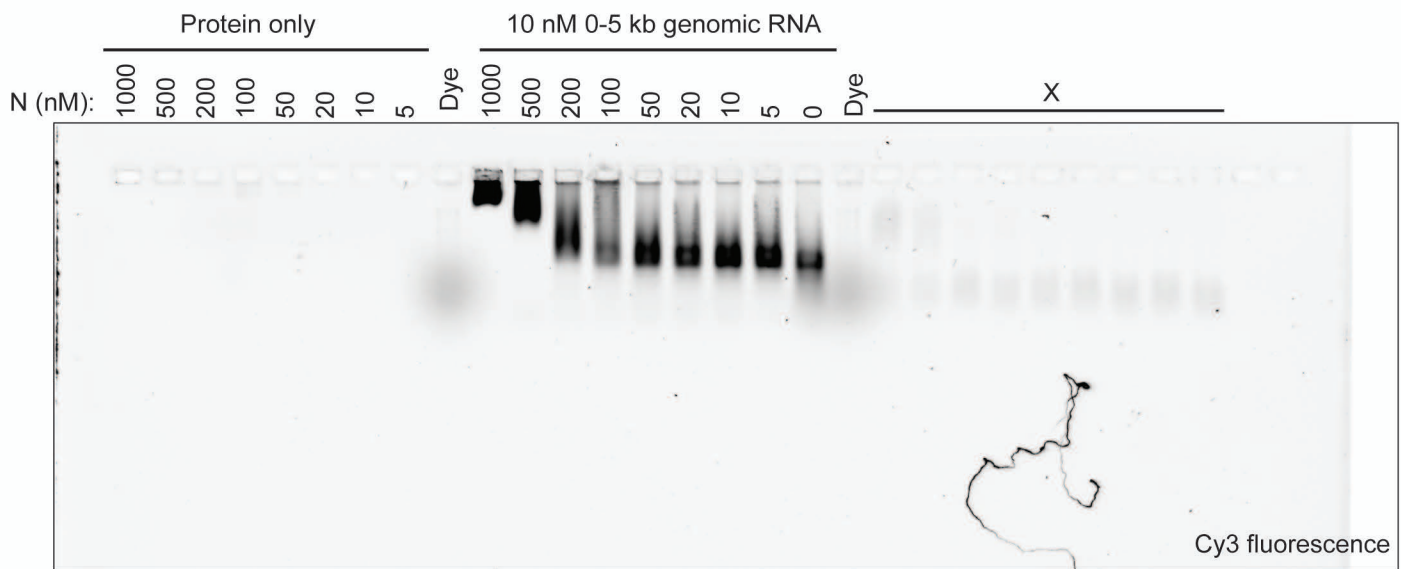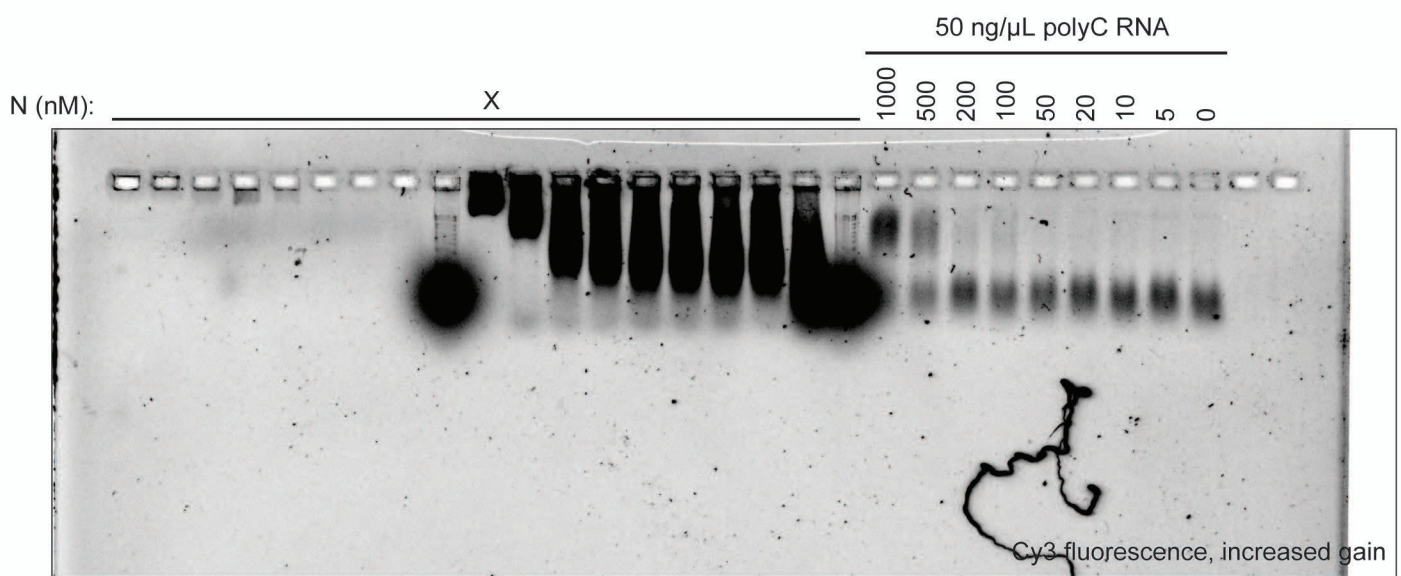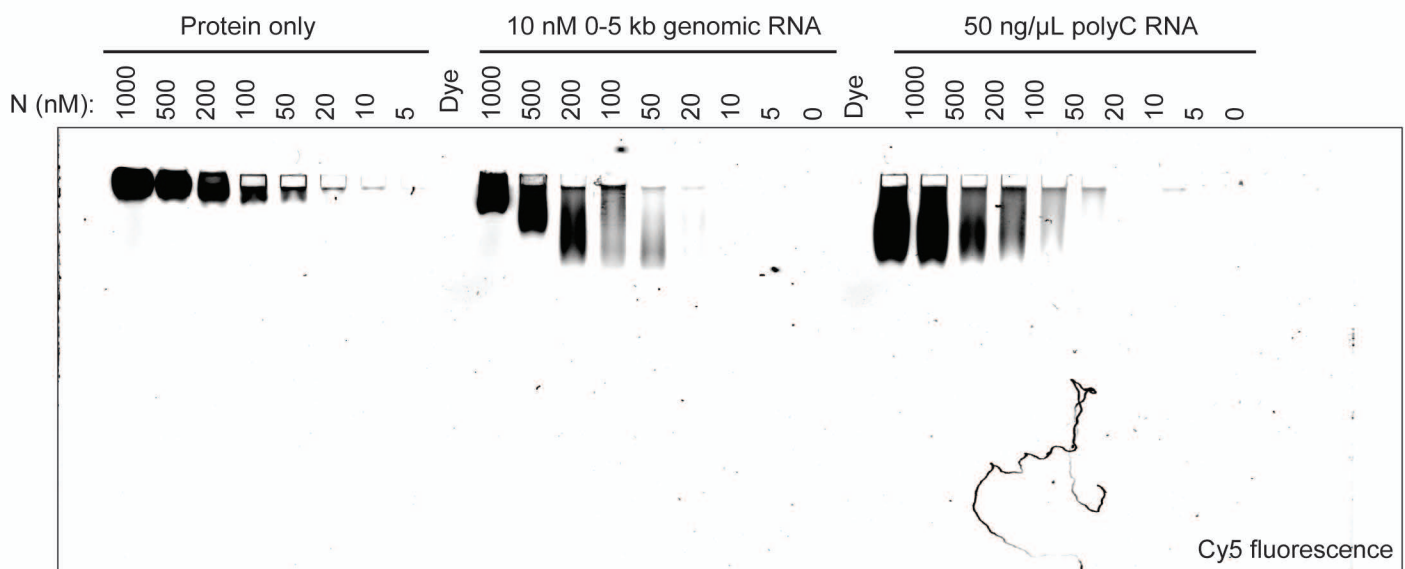

# S2A Fig

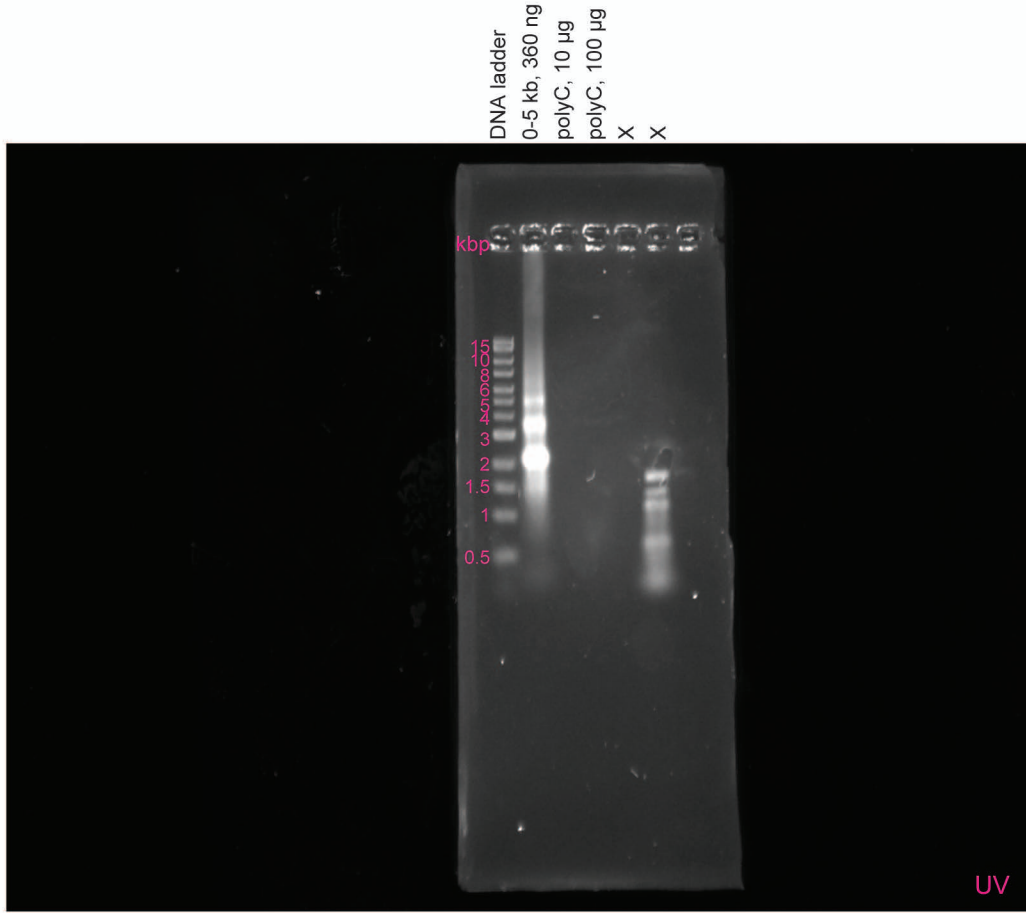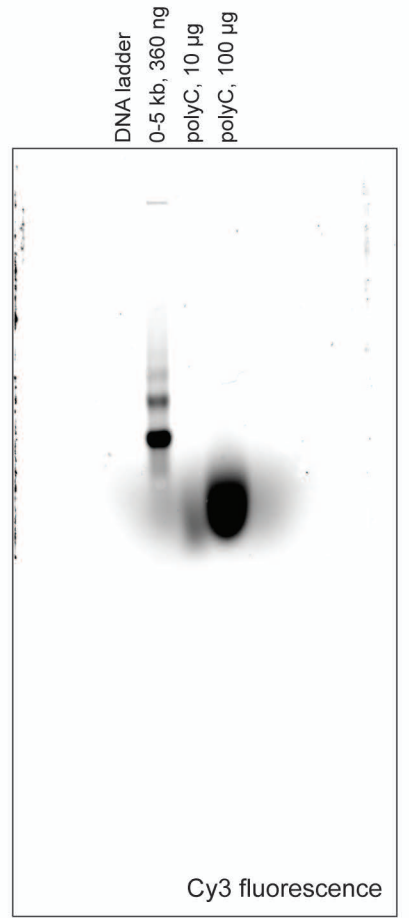

# S8A Fig

1. Pre-kinase
2. Post-kinase
3. Pre-phosphatase
4. Post-phosphatase

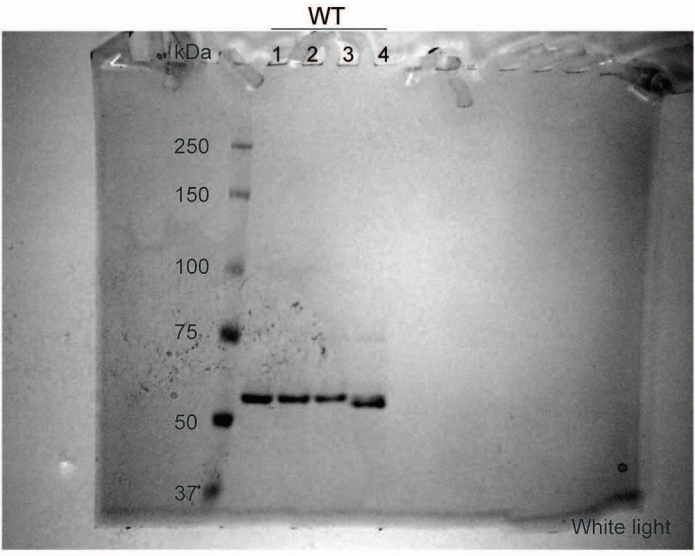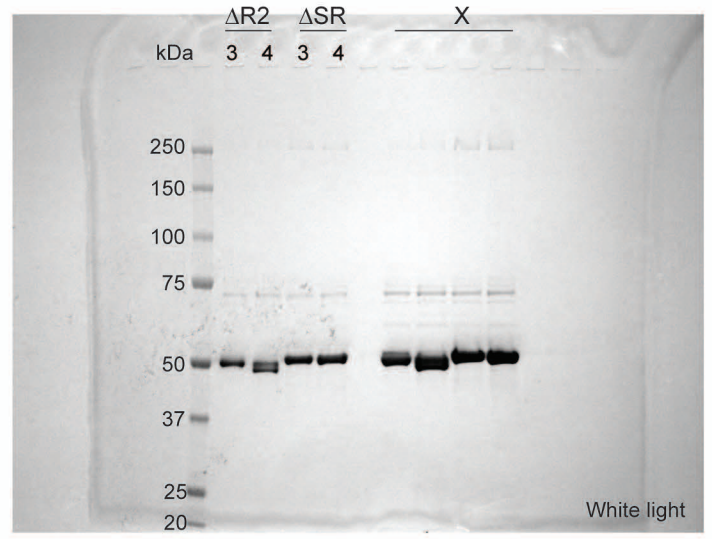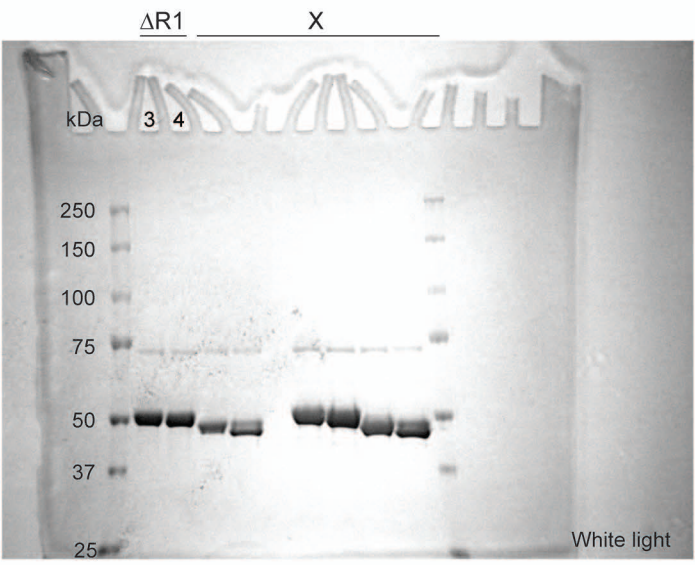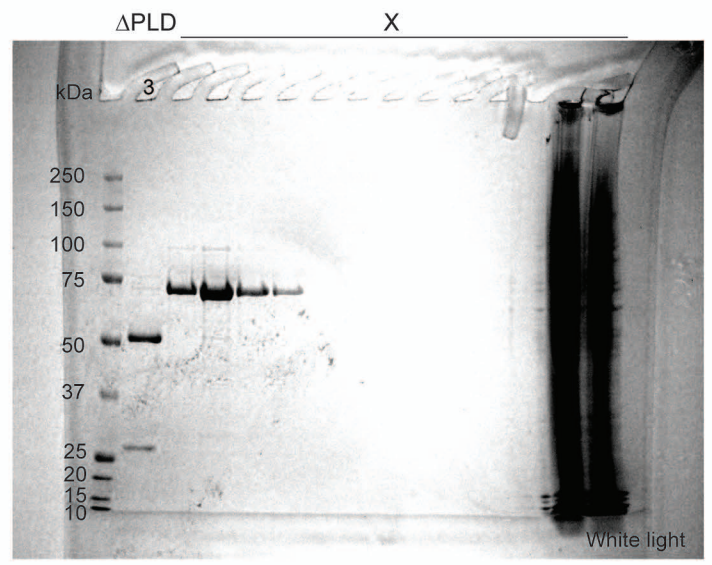

# S8C Fig

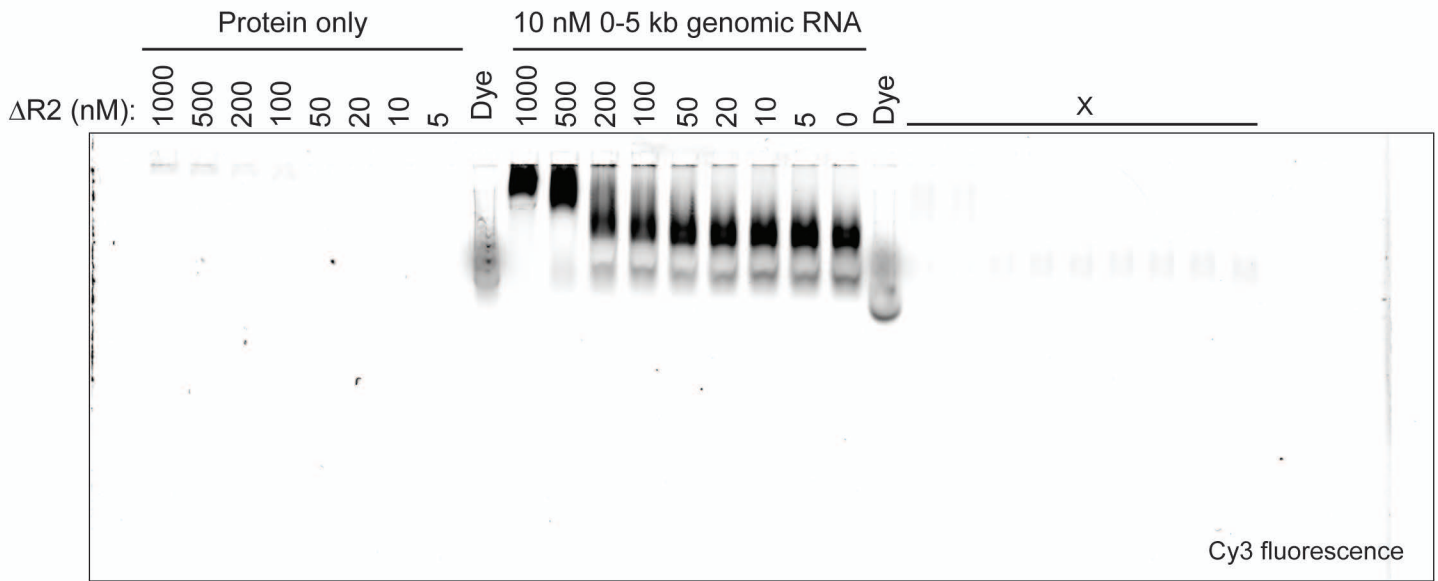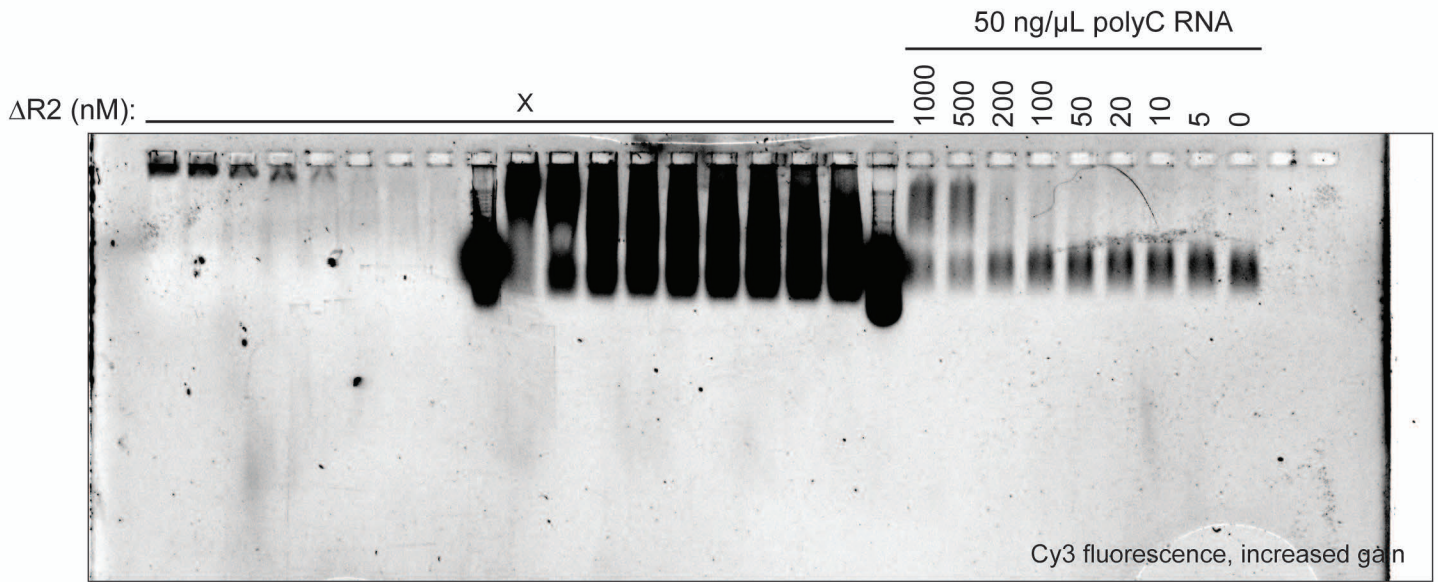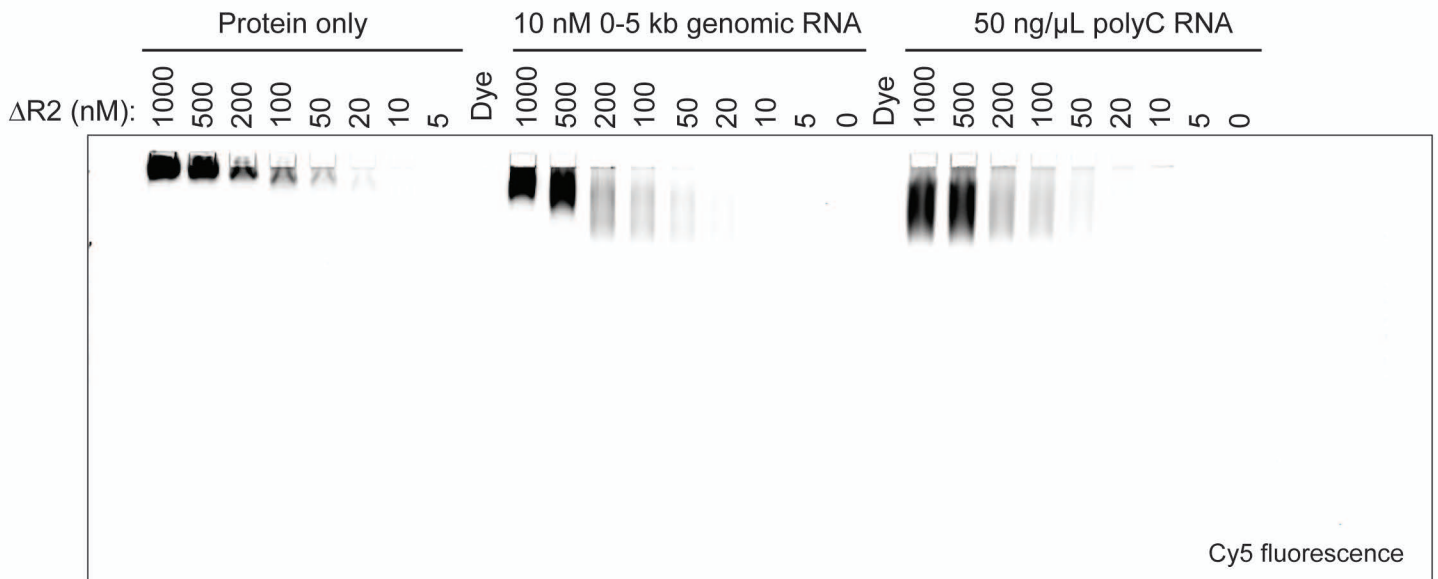

Supplement: pbio.3001425.s021.pdf [file pbio.3001425.s021.pdf]
